# Supplementary material
Source: PubMed Central journal article supplement (PMC8986057)
Supplement: 7471_2_supp_90065_qzhg2b.pdf [file 7471_2_supp_90065_qzhg2b.pdf]

## Supplemental Table 1.

### *Nephrotic Syndrome Inclusion Codes (all individuals):*

| ICD-9/10 | Description/Diagnosis                                                           |
|----------|---------------------------------------------------------------------------------|
| 581.1    | Nephrotic syndrome with lesion of MN or FSGS                                    |
| 581.3    | Nephrotic syndrome with lesion of MCD                                           |
| 582.1    | Chronic GN with lesion of MN or FSGS                                            |
| 583.1    | Nephritis and nephropathy; acute/chronic unspecified, with lesion of MN or FSGS |
| N02.0    | Recurrent and persistent hematuria with minor glomerular abnormality            |
| N04.0    | Nephrotic syndrome with minor glomerular abnormality                            |
| N03.3    | Chronic nephritic syndrome with diffuse mesangial proliferative GN              |
| N05.2    | Unspecified nephritic syndrome with diffuse membranous GN                       |

MN: Membranous nephropathy; FSGS: Focal segmental glomerulosclerosis; MCD: minimal change disease; GN: glomerulonephritis

### *Nephrotic Syndrome Not Otherwise Specified Inclusion Codes (individuals <20 years of age only):*

|       |                                                         |
|-------|---------------------------------------------------------|
| 581.9 | Nephrotic syndrome with unspecified lesion              |
| N04.9 | Nephrotic syndrome with unspecified morphologic changes |

### *Exclusion Codes:*

| ICD-9/10 | Description/Diagnosis                                                                                            |
|----------|------------------------------------------------------------------------------------------------------------------|
| 583.89   | Nephritis and nephropathy, not specified as acute or chronic, with other specified pathological lesion in kidney |
| 582.89   | Chronic glomerulonephritis with other specified pathological lesion in kidney                                    |
| 583      | Nephritis and nephropathy not specified as acute or chronic                                                      |
| V08      | Asymptomatic human immunodeficiency virus [HIV] infection status                                                 |
| 42       | HIV disease                                                                                                      |
| 42.1     | HIV disease                                                                                                      |
| 42.2     | HIV disease                                                                                                      |
| 42.8     | HIV disease                                                                                                      |
| 42.9     | HIV disease                                                                                                      |
| 70.2     | Viral hepatitis B                                                                                                |
| 70.21    | Viral hepatitis B                                                                                                |
| 70.22    | Viral hepatitis B                                                                                                |
| 70.23    | Viral hepatitis B                                                                                                |
| 70.3     | Viral hepatitis B                                                                                                |
| 70.31    | Viral hepatitis B                                                                                                |
| 70.32    | Viral hepatitis B                                                                                                |
| 70.33    | Viral hepatitis B                                                                                                |
| 70.41    | Other viral hepatitis                                                                                            |
| 70.44    | Other viral hepatitis                                                                                            |
| 70.51    | Other viral hepatitis                                                                                            |
| 70.54    | Other viral hepatitis                                                                                            |

|        |                                                                                              |
|--------|----------------------------------------------------------------------------------------------|
| 70.7   | Viral hepatitis C                                                                            |
| 70.71  | Viral hepatitis C                                                                            |
| 287    | Purpura and other hemorrhagic conditions                                                     |
| 580    | Acute glomerulonephritis                                                                     |
| 580.4  | Acute glomerulonephritis with lesion of rapidly progressive glomerulonephritis               |
| 593.73 | Other vesicoureteral reflux with reflux nephropathy NOS                                      |
| 741.9  | Spina bifida without mention of hydrocephalus                                                |
| 741    | Spina bifida                                                                                 |
| 596.54 | Neurogenic bladder NOS                                                                       |
| 277.87 | Disorders of mitochondrial metabolism                                                        |
| 593.7  | Vesicoureteral reflux                                                                        |
| 582.9  | Chronic glomerulonephritis with unspecified pathological lesion in kidney                    |
| 583.2  | Hypocomplementemic persistent glomerulonephritis                                             |
| 582.0  | Chronic glomerulonephritis                                                                   |
| 277.39 | Amyloidosis                                                                                  |
| 277.3  | Amyloidosis                                                                                  |
| 277.30 | Amyloidosis                                                                                  |
| 250.40 | Diabetes with renal manifestations                                                           |
| 250.43 | Diabetes with renal manifestations                                                           |
| 250.41 | Diabetes with renal manifestations                                                           |
| 710    | Diffuse diseases of connective tissue                                                        |
| 710.0  | Systemic lupus erythematosus                                                                 |
| N05.1  | Unspecified nephritic syndrome with focal and segmental glomerular lesions                   |
| N06.1  | Isolated proteinuria with focal and segmental glomerular lesions                             |
| N07.1  | Hereditary nephropathy, not elsewhere classified with focal and segmental glomerular lesions |
| N03.8  | Chronic nephritic syndrome with other morphologic changes                                    |
| N05.9  | Unspecified nephritic syndrome with unspecified morphologic changes                          |
| Z21    | Asymptomatic human immunodeficiency virus infection status                                   |
| B20    | Human immunodeficiency virus disease                                                         |
| B16.2  | Acute hepatitis B                                                                            |
| B19.1  | Unspecified viral hepatitis B                                                                |
| B16.0  | Acute hepatitis B                                                                            |
| B18.1  | Chronic viral hepatitis B                                                                    |
| B180   | Chronic viral hepatitis B                                                                    |
| B16.9  | Acute hepatitis B                                                                            |
| B191.0 | Unspecified viral hepatitis B                                                                |
| B161   | Acute hepatitis B                                                                            |
| B17.11 | Acute hepatitis C                                                                            |
| B18.2  | Chronic viral hepatitis C                                                                    |
| B17.10 | Acute hepatitis C                                                                            |
| B19.20 | Unspecified viral hepatitis C                                                                |
| B192.1 | Unspecified viral hepatitis C                                                                |
| D69.0  | Allergic purpura                                                                             |

|         |                                                                                                |
|---------|------------------------------------------------------------------------------------------------|
| N00.3   | Acute nephritic syndrome with diffuse mesangial proliferative glomerulonephritis               |
| N01.3   | Rapidly progressive nephritic syndrome with diffuse mesangial proliferative glomerulonephritis |
| N13.729 | Vesicoureteral-reflux with reflux nephropathy                                                  |
| Q05.8   | Spina bifida                                                                                   |
| Q05.4   | Spina bifida                                                                                   |
| N31.9   | Unspecified neuromuscular dysfunction of bladder                                               |
| E884.0  | Mitochondrial metabolism disorders                                                             |
| E884.1  | Mitochondrial metabolism disorders, MELAS                                                      |
| E884.2  | Mitochondrial metabolism disorders, MERRF syndrome                                             |
| E884.9  | Mitochondrial metabolism disorders                                                             |
| H49819  | Kearns-Sayre syndrome                                                                          |
| N13.729 | Vesicoureteral-reflux with reflux nephropathy                                                  |
| N13.70  | Vesicoureteral reflux unspecified                                                              |
| N03.9   | Chronic nephritic syndrome with unspecified morphologic changes                                |
| N05.5   | Unspecified nephritic syndrome with diffuse mesangiocapillary glomerulonephritis               |
| N03.2   | Chronic nephritic syndrome with diffuse membranous glomerulonephritis                          |
| E85.1   | Neuropathic hereditary amyloidosis                                                             |
| E853    | Secondary systemic amyloidosis                                                                 |
| E858    | Secondary systemic amyloidosis                                                                 |
| E08.21  | Diabetes mellitus due to underlying condition with diabetic nephropathy                        |
| E08.22  | Diabetes mellitus due to underlying condition with diabetic chronic kidney disease             |
| E112.9  | Type 2 diabetes mellitus with other diabetic kidney complication                               |
| E102.9  | Type 1 diabetes mellitus with other diabetic kidney complication                               |
| M32.10  | Systemic lupus erythematosus, organ or system involvement unspecified                          |

**Supplemental Table 2. Performance characteristics of the computable phenotype at 3 academic PCORnet centers, excluding individuals <20 years old**

| <i>Center</i>                    | <b>True positive</b> | <b>False positive</b> | <b>False negative</b> | <b>True negative</b> | <b>Sensitivity</b> | <b>Specificity</b> | <b>Positive Predictive Value</b> | <b>Negative Predictive Value</b> | <b>Accuracy</b> | <b>F1 score</b> | <b>Area under curve (95% CI)</b> |
|----------------------------------|----------------------|-----------------------|-----------------------|----------------------|--------------------|--------------------|----------------------------------|----------------------------------|-----------------|-----------------|----------------------------------|
| <i>University of Michigan</i>    | 30                   | 7                     | 1                     | 36                   | 0.97               | 0.84               | 0.81                             | 0.97                             | 0.89            | 0.88            | 0.90 [0.84 to 0.97]              |
| <i>The Ohio State University</i> | 35                   | 15                    | 0                     | 49                   | 1.00               | 0.77               | 0.70                             | 1.00                             | 0.85            | 0.82            | 0.88 [0.83 to 0.94]              |
| <i>Mayo Clinic</i>               | 31                   | 14                    | 0                     | 45                   | 1.00               | 0.76               | 0.69                             | 1.00                             | 0.84            | 0.82            | 0.88 [0.83 to 0.94]              |
